CORRECTION

# Correction: Pregnancy Outcomes after Treatment for Cervical Cancer Precursor Lesions: An Observational Study

The *PLOS ONE* Staff

In the Funding section, the last sentence is incorrectly included in the statement. The publisher apologizes for the error. The correct funding information is as follows: GlaxoSmithKline Biologicals SA funded this study/research and was involved in all stages of study conduct, including analysis of the data. GlaxoSmithKline Biologicals SA also took in charge all costs associated with the development and publication of this manuscript (GSK study number: GHO-09-3981).

## Reference

1. Weinmann S, Naleway A, Swamy G, Krishnarajah G, Arondekar B, Fernandez J, et al. (2017) Pregnancy Outcomes after Treatment for Cervical Cancer Precursor Lesions: An Observational Study. PLoS ONE 12(1): e0165276. doi:[10.1371/journal.pone.0165276](https://doi.org/10.1371/journal.pone.0165276) PMID: [28052083](https://pubmed.ncbi.nlm.nih.gov/28052083/)

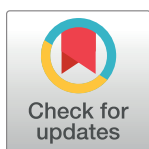

## OPEN ACCESS

**Citation:** The *PLOS ONE* Staff (2017) Correction: Pregnancy Outcomes after Treatment for Cervical Cancer Precursor Lesions: An Observational Study. PLoS ONE 12(2): e0172417. doi:[10.1371/journal.pone.0172417](https://doi.org/10.1371/journal.pone.0172417)

**Published:** February 13, 2017

**Copyright:** © 2017 The PLOS ONE Staff. This is an open access article distributed under the terms of the [Creative Commons Attribution License](https://creativecommons.org/licenses/by/4.0/), which permits unrestricted use, distribution, and reproduction in any medium, provided the original author and source are credited.
